# Supplementary material for: False positive results obtained with latex agglutination identification of Staphylococcus aureus caused by Macrococcus caseolyticus and Mammaliicoccus fleurettii
Source: Research Square preprint supplement (doi:10.21203/rs.3.rs-6992360/v1), 2025-07-14
Supplement: Supplementary file 1 [file 83ca637ae70d31c9043c3935.xlsx]

## Sheet: Arkusz1
Isolate	Final identification	MDR	Penicillin		Amoxicillin with Clavulanic Acid		Cefpodoxime		Oxacillin		Cefoxitin		Amikacin		Gentamicin		Norfloxacin		Erythromycin		Clindamycin		Tetracycline		Chloramphenicol
			*		*		*		*		*		*		*		*		*		*		*		*
K_14/1	Macrococcus caseolyticus	+	24	R	20	S	18	S	0	R	15	R	18	S	20	S	20	S	20	R	18	R	18	R	20	S
K_16/1	Macrococcus caseolyticus	+	24	R	20	S	22	S	0	R	15	R	19	S	21	S	24	S	18	R	18	R	12	R	20	S
K_27/1	Macrococcus caseolyticus	+	20	R	20	S	18	S	0	R	16	R	14	R	16	R	13	R	15	R	12	R	15	R	16	I
K_30/1	Macrococcus caseolyticus	+	20	R	20	S	13	R	0	R	15	R	14	R	15	R	22	S	15	R	13	R	18	R	18	S
K_7/2	Macrococcus caseolyticus	+	23	R	20	S	18	S	10	R	16	R	13	R	18	S	15	R	17	R	15	R	20	R	20	S
Wol_20/2	Macrococcus caseolyticus	+	23	R	20	S	17	R	13	R	21	R	14	R	15	R	21	S	18	R	15	R	10	R	22	S
Sw_16/2	Macrococcus caseolyticus	+	20	R	20	S	13	R	12	R	20	R	18	S	17	R	18	S	18	R	18	R	20	R	16	I
Sw_14/1	Macrococcus caseolyticus	+	20	R	30	S	22	S	18	R	25	S	28	S	28	S	23	S	22	S	25	S	10	R	28	S
Wol_18/2	Mammaliicoccus fleurettii	-	28	S	34	S	24	S	15	R	32	S	35	S	25	S	30	S	25	S	22	S	30	S	27	S
Wol_19/2	Mammaliicoccus fleurettii	+	20	R	24	S	20	S	0	R	28	S	25	S	26	S	27	S	25	S	15	R	9	R	28	S
Wol_29/2	Mammaliicoccus fleurettii	+	16	R	20	S	18	S	8	R	19	R	20	S	25	S	26	S	25	S	15	R	9	R	26	S
Wol_11/2	Mammaliicoccus fleurettii	-	28	S	22	S	21	S	24	S	26	S	28	S	24	S	29	S	24	S	26	S	29	R	28	S
K _17/1	S. lugdunensis	-	31	S	28	S	22	S	22	S	22	S	33	S	22	S	28	S	25	S	30	S	28	S	28	S
K_27/2	S. aureus	-	30	S	28	S	29	S	25	S	28	S	28	S	26	S	24	S	25	S	26	S	35	S	26	S
K_20/1	S. aureus	-	30	S	25	S	20	S	25	S	20	R	32	S	18	S	20	S	25	S	24	S	22	S	18	I
K_6/2	S. aureus	-	32	S	30	S	22	S	22	S	25	S	30	S	20	S	27	S	24	S	24	S	28	S	21	S
K_10/2	S. aureus	-	32	S	28	S	22	S	22	S	21	R	32	S	21	S	30	S	28	S	20	R	25	S	20	S
K_26/2	S. aureus	-	32	S	30	S	20	S	28	S	20	R	30	S	24	S	30	S	24	S	24	S	30	S	22	S
Sw_2/2	S. aureus	-	32	S	26	S	24	S	22	S	24	S	30	S	22	S	26	S	18	R	20	R	30	S	28	S
Sw_3/2	S. aureus	+	10	R	13	R	17	R	14	R	23	S	14	R	18	S	28	S	20	R	22	S	24	S	20	S
Sw_8/2	S. aureus	-	30	S	24	S	23	S	19	R	24	S	28	S	26	S	28	S	25	S	28	S	26	S	25	S
Sw_12/2	S. aureus	+	0	R	17	R	14	R	15	R	24	S	13	R	20	S	30	S	22	S	20	R	10	R	22	S
Sw_14/2	S. aureus	+	11	R	19	R	22	S	18	R	25	S	14	R	24	S	30	S	25	S	20	R	10	R	25	S
Wol_1/1	S. aureus	-	13	R	25	S	22	S	16/17	R	23	S	15	S	23	S	30	S	27	S	25	S	25	S	25	S
Sw_24/1	S. aureus	+	12	R	19	R	15	R	22	S	15	R	15	S	20	S	30	S	22	S	20	R	10	R	22	S
Sw_27/1	S. aureus	-	20	R	25	S	23	S	25	S	26	S	28	S	24	S	27	S	25	S	26	S	27	S	24	S
Sw_7/1	S. aureus	-	29	S	26	S	24	S	26	S	27	S	26	S	25	S	30	S	26	S	24	S	24	S	22	S
Sw_10/1	S. aureus (MRSA)	+	0	R	14	R	0	R	0	R	12	R	10	R	20	S	30	S	0	R	0	R	0	R	20	S
Sw_16/1	S. aureus	-	20	S	28	S	20	S	21	S	23	S	30	S	20	S	30	S	18	R	10	R	25	S	18	S
Sw_21/1	S. aureus	+	10	R	17	R	15	R	22	S	14	R	10	R	20	S	27	S	20	R	22	S	10	R	21	S
Sw_3/1	S. pseudintermedius	+	20	R	26	S	26	S	25	S	30	S	22	S	20	S	36	S	23	S	20	R	13	R	22	S
	Table S1. The results of antimicrobial susceptibility testing
	* - diameter of growth inhibition zone (mm)
	S - Susceptible
	R - Resistant
	I - Intermediate
